# Supplementary material for: A tailored hybrid BODIPY–oligothiophene donor for molecular bulk heterojunction solar cells with improved performances
Source: Royal Society of Chemistry journal article supplement (doi:10.1039/c0cc01144d), 2010-01-01
Supplement: c0cc01144d.pdf [file c0cc01144d.pdf]

## **Supplementary information**

### **A tailored hybrid BODIPY-oligothiophene donor for molecular bulk heterojunction solar cells with improved performances**

Theodulf Rousseau,<sup>a</sup> Antonio Cravino,<sup>a</sup> Emilie Ripaud,<sup>a</sup> Philippe Leriche,<sup>a</sup> Sandra Rihn,<sup>b</sup> Antoinette De Nicola,<sup>b</sup> Raymond Ziessel<sup>b</sup> and Jean Roncali<sup>a\*</sup>

#### **Devices preparation and characterization**

PCBM was purchased from NanoC and used as received. The PEDOT:PSS Baytron<sup>®</sup> PH500 suspension used to apply smoothing and hole conducting layers was received from HC Stark. As electrodes, indium-tin-oxide (ITO) coated glasses (Merck, sheet resistance  $\leq 20 \Omega/\square$ ) and evaporated Al films (ca. 100 nm thick) were used. The ITO electrodes were cleaned in ultrasonic baths then modified by a spin-cast layer of Baytron (filtered through a 0.45  $\mu\text{m}$  membrane just prior of casting at 5000 rpm), which was then dried at 130 °C for 15 min.

Devices with ITO/Baytron/2:PC<sub>61</sub>BM/Al structure were realized from chloroform solutions containing the dye and PCBM. Spin-casting was done distributing the solutions drop by drop (5 $\times$ ) onto an already rotating stage (800-2000 rpm). The cell were completed by evaporation of Al through a round shadow mask (devices area of 0.28 cm<sup>2</sup>) After preparation, the solar cells were stored and characterized in a glove-box under an argon atmosphere. The *J-V* curves were recorded in dark and under illumination using a Keithley 236 source-measure unit and a homemade acquisition program. The light source was an AM1.5 Solar Constant 575 PV simulator (Steuernagel Lichttechnik, equipped with a metal halogenide lamp) and its intensity was measured by a broad-band power meter (13PEM001, Melles Griot). The devices were illuminated through the ITO electrode side. The efficiency values reported in this work are not corrected, neither for the possible solar simulator spectral mismatch nor for the reflection/absorbance of the glass/ITO/Baytron coated electrodes. IPCE spectra were recorded with a Perkin Elmer 7225 lock-in amplifier under monochromatic illumination at a chopping frequency of 210 Hz. The light from a W lamp was dispersed by an Acton SpectraPro150. Electronic absorption spectra were recorded with a Perkin Elmer Lambda 19 spectrophotometer.

**Table S1.** Electrical characteristics of bulk heterojunction solar cells based on compounds **2** and PC<sub>61</sub>BM under AM 1.5 simulated solar irradiation at 90 mW cm<sup>-2</sup>

| D/A Ratio  | A, $\lambda=370$ nm | A, $\lambda=665$ nm | $J_{sc}$ (mA cm <sup>-2</sup> ) | $V_{oc}$ (V) | FF (%) | $\eta$ (%) |
|------------|---------------------|---------------------|---------------------------------|--------------|--------|------------|
| <b>1:3</b> | 0.42                | 0.18                | 2.51                            | 0.80         | 35     | 0.80       |
| <b>1:3</b> | 0.45                | 0.22                | 6.51                            | 0.79         | 35     | 1.98       |
| <b>1:3</b> | 0.96                | 0.38                | 5.75                            | 0.80         | 35     | 1.80       |
| <b>1:2</b> | 0.33                | 0.18                | 4.16                            | 0.75         | 39     | 1.35       |
| <b>1:2</b> | 0.50                | 0.32                | 7.09                            | 0.76         | 34     | 2.06       |
| <b>1:2</b> | 0.47                | 0.28                | 6.93                            | 0.74         | 38     | 2.17       |
| <b>1:1</b> | 0.32                | 0.24                | 3.24                            | 0.75         | 32     | 0.86       |
| <b>1:1</b> | 0.36                | 0.28                | 4.40                            | 0.74         | 36     | 1.28       |
| <b>1:1</b> | 0.41                | 0.33                | 3.93                            | 0.69         | 34     | 1.02       |

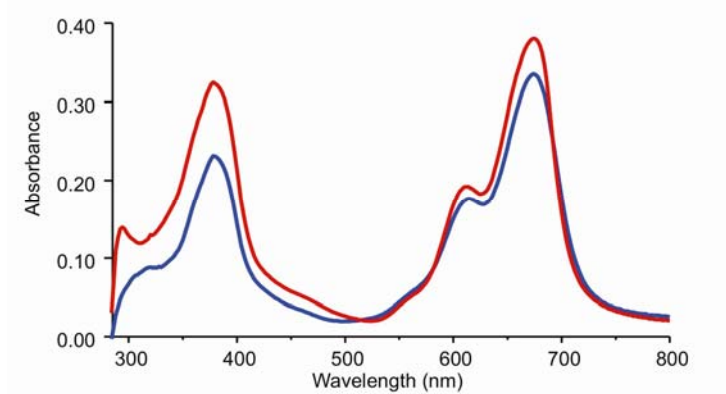

UV-Vis absorption spectra of ~60 nm films of compound **1** (blue) and **2** (red) spin-cast on glass from chloroform solutions

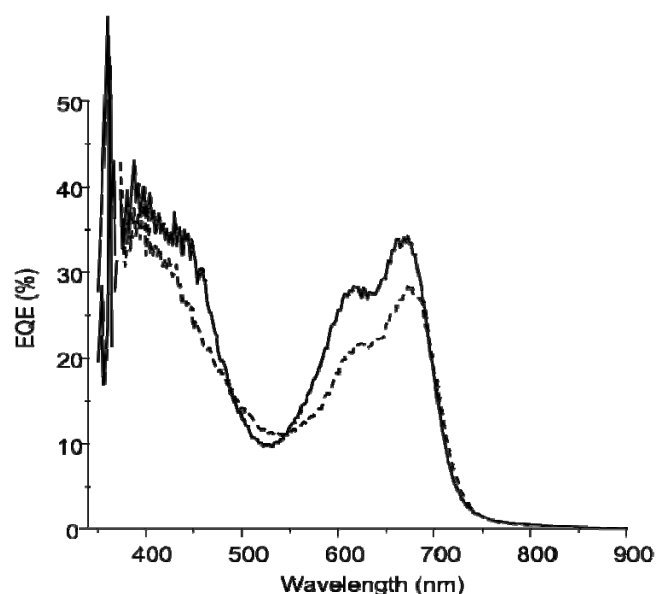

Comparison of the IPCE spectra of BHJ cells based on compound **1** (dashed line) and **2** (solid line)

### Estimation of the hole mobility of compounds **1** and **2**

To compare the hole mobility of the two compounds hole-only devices with the structure ITO/Baytron/donor/Au have been fabricated. Both compounds form ohmic contacts at low voltage, as seen by a linear current-voltage relationship with slope of unity in the log-log plots. Considering the structural similarity between the two molecules, the same density of charge carriers is assumed. Since this quantity is not known, based on mass considerations, we have arbitrarily taken a value corresponding to the half of that generally admitted for poly(3-hexylthiophene) namely  $N = 10^{15} \text{ cm}^{-3}$  (*D. Chirvase, Z. Chiguvere, M. Knipper, J. Parisi, V. Dyakonov, J. C. Hummelen, J. Appl. Phys., 2003, 93, 3376*). For film thicknesses of ca 60 nm, measured by profilometry we obtained a hole mobility of  $4.7 \times 10^{-4} \text{ V cm}^{-2} \text{ s}^{-1}$  for compound **1** and a twice larger value of  $9.0 \times 10^{-4} \text{ V cm}^{-2} \text{ s}^{-1}$  for compound **2**. Due to the uncertainty on  $N$ , the absolute value of the hole mobility cannot be obtained in this way but nevertheless these results clearly show that whatever the value of  $N$  the hole mobility of donor **2** is twice larger than that of **1**.

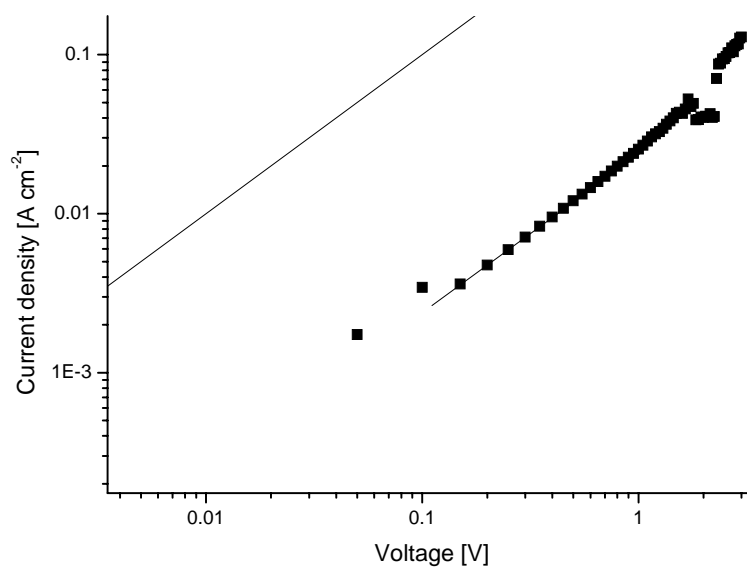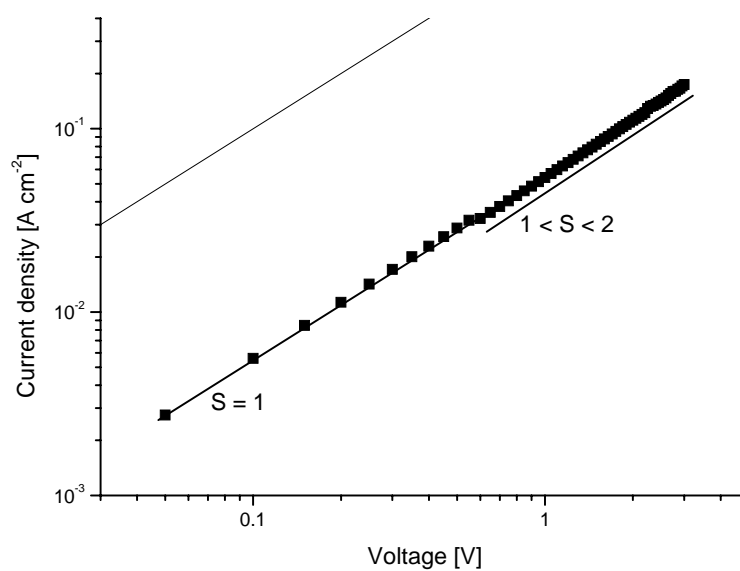

J-V plot for hole-only devices. Top: **1**. Bottom: **2**.

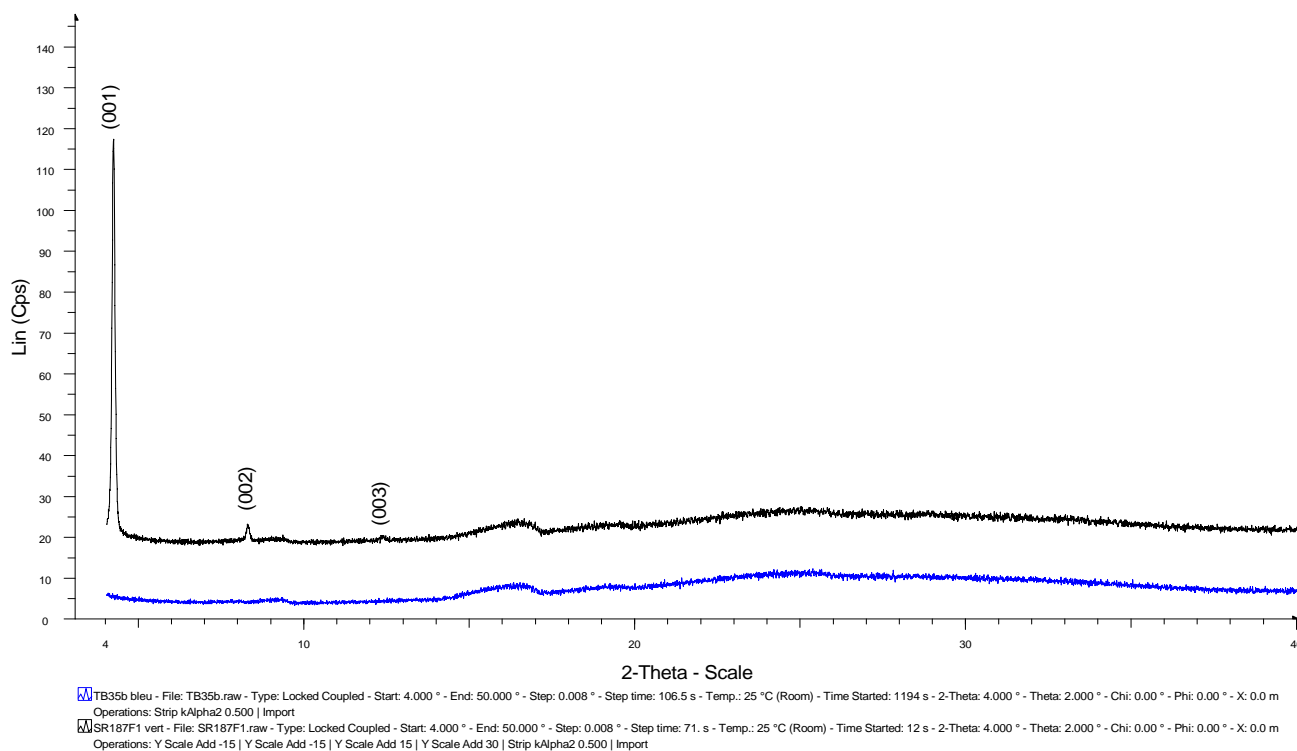

| Caption    | Angle<br>2-Theta ° | d value<br>Angstrom | Intensity<br>Cps | h | k | l |
|------------|--------------------|---------------------|------------------|---|---|---|
| d=20.98563 | 4.207              | 20.98563            | 120              | 0 | 0 | 1 |
| d=10.66533 | 8.284              | 10.66533            | 23.8             | 0 | 0 | 2 |
| d=7.15256  | 12.365             | 7.15256             | 22.6             | 0 | 0 | 3 |

Films of **1** and **2** cast on glass have been analyzed by X-ray diffraction in reflection mode on a Bruker D8 Advance diffractometer, equipped with a speed detector Vantec and utilizing CuK $\alpha$  radiation ( $\lambda = 1.5406 \text{ \AA}$ ).

For **1**(blue) the XRD diagram shows no diffraction peak indicating an amorphous character while for **2** (black), thin diffraction peaks reveal a crystalline organisation on the substrate. The XRD diagram shows an intense diffraction peak (*001*) at  $2\theta = 4.207^\circ$  and two weak peaks respectively at  $2\theta = 8.284^\circ$  and  $2\theta = 12.365^\circ$  which should correspond to a distance between two molecular layers of approximately  $21 \text{ \AA}$ .

**SR187F1 : PCBM- 1:2 weight ratio**

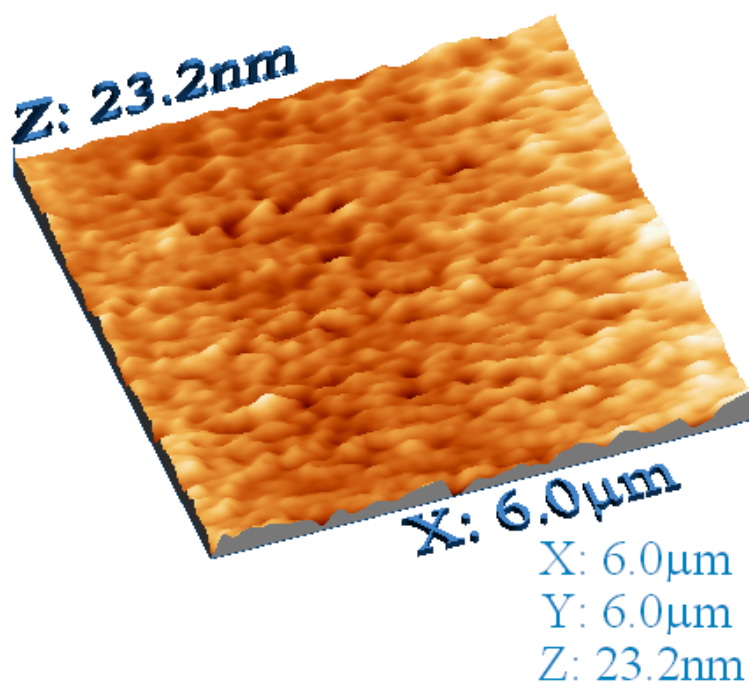

**TB35B : PCBM- 1:2 weight ratio**

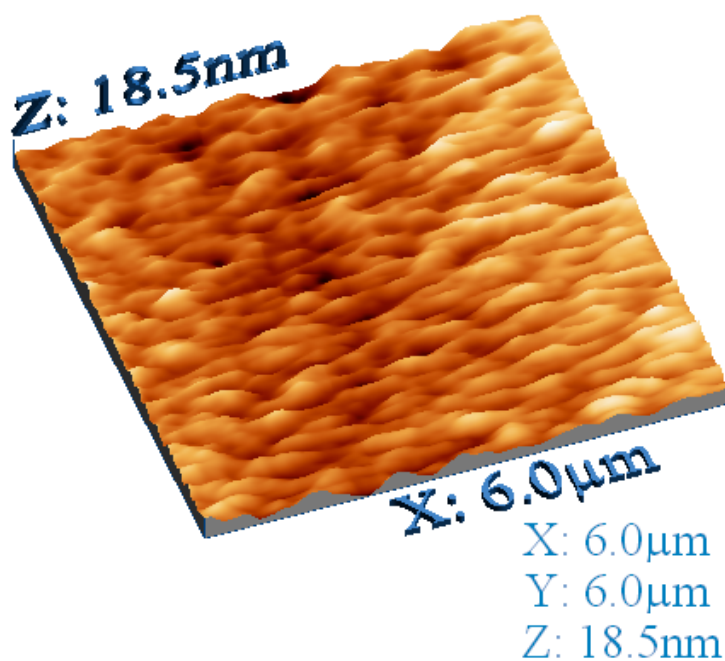

Contact mode AFM images of the blend 2:PCBM (top) & 1:PCBM (bottom) (1:2 ratio by weight) films spin cast from chloroform solution were obtained and compared. Images were collected in air using a silicon cantilever. For each sample, images were collected on multiple locations to examine the film uniformity. We notice that the 2:PCBM films appear slightly smoother (RMS of 3 nm) than the 1:PCBM-films (RMS= 3.5 nm).

### SCLC mobility measurements

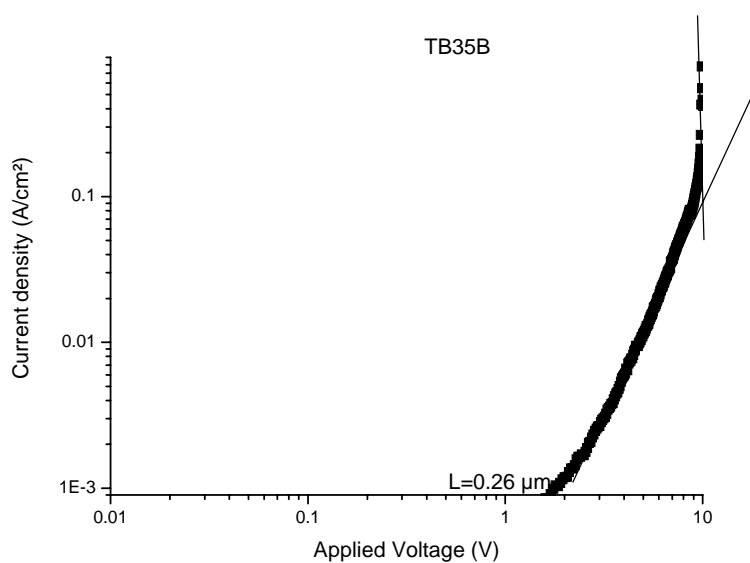

$$\mu_h^{SCL} (1) = 5.10 \cdot 10^{-5} \text{ cm}^2\text{V}^{-1}\text{s}^{-1}$$

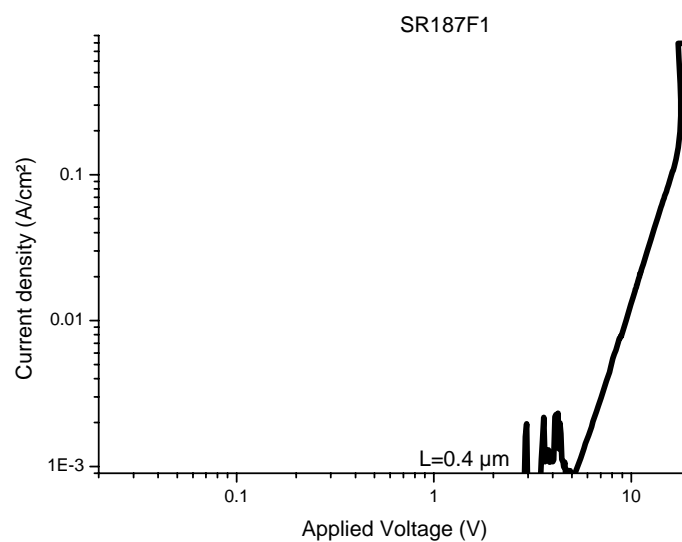

$$\mu_h^{SCL} (2) = 9.70 \cdot 10^{-5} \text{ cm}^2\text{V}^{-1}\text{s}^{-1}$$
